# Supplementary material for: Comprehensive Two-Dimensional Gas Chromatography–Mass Spectrometry Analysis of Exhaled Breath Compounds after Whole Grain Diets
Source: Molecules. 2021 May 2;26(9):2667. doi: 10.3390/molecules26092667 (PMC8125105; doi:10.3390/molecules26092667)
Supplement: Supplementary file 1 [file molecules-26-02667-s001.zip › molecules-1183973-supplementary.pdf]

**Table S1.** The detected volatile organic compounds (86) with tentative identification<sup>1</sup> from exhaled breath samples (n=32) of nine study participants.

| <b>Compound name</b>             | <b>RT</b> | <b>SI</b> |
|----------------------------------|-----------|-----------|
| e-1,3-Pentadiene                 | 7.6       | 97        |
| Carbon dioxide                   | 7.6       | 95        |
| z-1,3-Pentadiene                 | 7.9       | 97        |
| Isoprene                         | 8.1       | 97        |
| Pentane, 2,3-dimethyl            | 8.2       | 87        |
| Dimethyl sulfide                 | 8.4       | 94        |
| 1-Propene, 2-methyl-             | 8.4       | 91        |
| Octane, 4,5-dimethyl             | 8.6       | 80        |
| Hexane                           | 8.7       | 96        |
| Acetaldehyde                     | 8.8       | 94        |
| Heptane, 3,4-dimethyl-           | 8.8       | 87        |
| Cyclopentane, methyl-            | 8.8       | 82        |
| Heptane                          | 9.0       | 87        |
| Octane                           | 9.5       | 89        |
| Acetone                          | 9.6       | 94        |
| Ethyl acetate                    | 9.9       | 87        |
| 3-Pentanol/ 2-propanol, 2-methyl | 10.0      | 89        |
| Butanal                          | 10.3      | 92        |
| 2-Propanol                       | 10.6      | 97        |
| Propane, 1-(methylthio)-         | 10.7      | 85        |
| 2-Butanone                       | 10.7      | 93        |
| Ethanol                          | 11.0      | 97        |
| Methyl vinyl ketone              | 11.1      | 94        |
| Sulfide, allyl methyl            | 11.2      | 85        |
| Benzene                          | 11.5      | 91        |
| Pentanal                         | 11.9      | 92        |
| 2-Pentanone                      | 11.9      | 88        |
| 2,3-Butanedione                  | 12.0      | 94        |
| Methyl methacrylate              | 12.7      | 85        |
| 1-Propene, 1-(methylthio)-       | 12.9      | 91        |
| $\alpha$ -Pinene                 | 13.0      | 88        |
| Acetonitrile                     | 13.2      | 90        |
| 1-Propanol                       | 13.8      | 94        |
| Toluene                          | 14.2      | 92        |
| 2-Butenal                        | 14.3      | 91        |
| Disulfide, dimethyl              | 14.8      | 84        |
| Hexanal                          | 15.5      | 95        |
| Ethylbenzene                     | 17.0      | 86        |
| Benzene, 1,4-dimethyl-           | 17.5      | 91        |
| 1-Butanol                        | 18.7      | 93        |
| 1,3,5-Trioxane                   | 19.4      | 89        |
| Benzene, 1,2-dimethyl-           | 19.5      | 89        |
| Ethanol, 2-methoxy-              | 19.6      | 96        |

|                                                                                 |       |    |
|---------------------------------------------------------------------------------|-------|----|
| D-Limonene                                                                      | 19.9  | 96 |
| Heptanal                                                                        | 20.0  | 94 |
| Eucalyptol                                                                      | 20.3  | 89 |
| Ethanol, 2-ethoxy-                                                              | 21.3  | 95 |
| Benzene, 1-ethyl-3-methyl-                                                      | 21.4  | 82 |
| 1-Pentanol                                                                      | 23.0  | 82 |
| Styrene                                                                         | 23.1  | 97 |
| o/p-Cymene                                                                      | 23.4  | 82 |
| Benzene, 1,3,5-trimethyl-                                                       | 24.0  | 87 |
| Cyclohexanone                                                                   | 24.4  | 84 |
| Octanal                                                                         | 24.6  | 96 |
| Undecane                                                                        | 25.2  | 86 |
| $\alpha$ -Methylstyrene                                                         | 26.7  | 88 |
| 5-Hepten-2-one, 6-methyl-                                                       | 27.0  | 93 |
| Ethanol, 2-(ethenyloxy)-                                                        | 28.2  | 94 |
| Nonanal                                                                         | 29.5  | 97 |
| Tetradecane                                                                     | 30.1  | 84 |
| Benzoic acid <sup>2</sup>                                                       | 30-69 | 95 |
| 2-Decen-1-ol                                                                    | 32.1  | 87 |
| 1-Hexanol, 2-ethyl-                                                             | 34.0  | 96 |
| Decanal                                                                         | 34.6  | 95 |
| 1,3,5,7-Tetroxane                                                               | 35.6  | 82 |
| Benzaldehyde                                                                    | 36.0  | 89 |
| Acetophenone                                                                    | 40.7  | 89 |
| Cyclohexanol, 5-methyl-2-(1-methylethyl)-                                       | 40.7  | 90 |
| Benzaldehyde, 4-methyl- / Benzaldehyde, 2-methyl-                               | 40.8  | 87 |
| Ethanol, 2-(2-ethoxyethoxy)-                                                    | 40.8  | 95 |
| Phthalic acid / Phthalic anhydride <sup>2</sup>                                 | 40-69 | 93 |
| Anethole                                                                        | 47.8  | 90 |
| Propanoic acid, 2-methyl-, 1-(1,1-dimethylethyl)-2-methyl-1,3-propanediyl ester | 49.4  | 80 |
| Hexanoic acid                                                                   | 50-60 | 85 |
| Phenol                                                                          | 53.9  | 90 |
| 2(3H)-Furanone, dihydro-4-hydroxy <sup>2</sup>                                  | 57.5  | 85 |
| Ethanol, 2-phenoxy                                                              | 58.8  | 90 |
| ethanedione, diphenyl <sup>2</sup>                                              | 61.7  | 94 |
| 3,6,9,12-Tetraoxatetradecan-1-ol                                                | 62-69 | 88 |
| 2(3H)-Furanone, 5-dodecyldihydro- <sup>2</sup>                                  | 63.7  | 92 |
| 1-Dodecanol, 2-octyl-                                                           | 64.8  | 93 |
| Benzamide <sup>2</sup>                                                          | 65.5  | 94 |
| 2(3H)-Furanone, dihydro-5-tetradecyl <sup>2</sup>                               | 67.7  | 89 |
| Phenol, 2,4-bis(1,1-dimethylethyl)-                                             | 67.8  | 92 |
| 4-Nonylphenol                                                                   | 67.9  | 90 |
| Methanone, diphenyl                                                             | 69.1  | 70 |

RT = retention time (min), SI = similarity index in the mass spectrum comparison, <sup>1</sup> tentative identification was made by comparing mass spectrum with mass spectral databases and not confirmed by using retention indices

or analytical standards, compounds detected only in a single exhaled breath sample were excluded, <sup>2</sup> detected only during whole grain diet
